# Supplementary material for: Increased Frataxin Expression Induced in Friedreich Ataxia Cells by Platinum TALE-VP64s or Platinum TALE-SunTag
Source: PubMed Central journal article supplement (PMC6019861; doi:10.1016/j.omtn.2018.04.009), 2018-04-27
Supplement: mmc1.pdf [file mmc1.pdf]

**OMTN, Volume 12**

**Supplemental Information**

**Increased Frataxin Expression Induced  
in Friedreich Ataxia Cells by Platinum  
TALE-VP64s or Platinum TALE-SunTag**

**Khadija Cherif, Catherine Gérard, Joël Rousseau, Dominique L. Ouellet, Pierre  
Chapdelaine, and Jacques P. Tremblay**

## **Increased frataxin expression induced in Friedreich ataxia cells**

### **by platinum TALE-VP64s or platinum TALE-SunTag**

Khadija Cherif, Catherine Gérard, Joël Rousseau, Dominique L. Ouellet,

Pierre Chapdelaine and Jacques P. Tremblay\*

Centre de Recherche du CHU de Québec-Université Laval and Département

de Médecine Moléculaire de l'Université Laval Québec, Canada.

## **Supplementary results**

### **Assembly of the various TALEN**

The assembled TALENs were verified by PCR (Figure 1S).

### **Lack of improvement in the specificity and affinity of pTALEs with new nRVD sequences (npTALEs)**

To further improve our therapeutic approach, we constructed pTALEs with new RVDs (nRVDs)

<sup>1</sup> (i.e., npTALE<sub>VP64s</sub>) to increase the specificity and affinity of RVDs. First, the mutations of the nucleotides encoding the amino acid at position 12 coding for the RVD were made in the plasmids pCR3.1-pTALE<sub>VP64-8-15</sub> and pCR3.1-pTALE<sub>-VP64-F4-15</sub>. These mutations replaced the RVDs NI, NG, and NN by CI, HG and EN respectively to generate the new RVDs. These new RVDs also contained 34 amino acids and were different from normal RVDs only by substitutions of the nucleotides encoding the amino acid in position 12. These base changes were AAC to TGC (to modify the asparagine into a cysteine, thus changing the RVDs NI into CI), AAC to CAC (to modify the asparagine into a histidine, thus changing the RVD NG into HG) and AAC to GAG (to modify the asparagine into a glutamic acid, thus changing the RVD NN into EN) (Figure S2A).

Thereafter, 2 new npTALE<sub>VP64s</sub> with 15 nRVDs were built according to the same protocol that was used to build the pTALE<sub>VP64s</sub>. These npTALE<sub>VP64s</sub> targeted 2 sequences of 15 nucleotides sequences (i.e., *FXN* sequences 8 and F4) (Figure S2B). These 2 npTALE<sub>VP64s</sub> were nucleofected in FRDA4078 cells to analyze 3 days later their effects on the transcriptional activity of the *FXN* gene. QRT-PCR analyzes (or analysis) were performed to quantify the number of *FXN* mRNA

copies. The transcriptional activity was normalized to GAPDH and HPRT, and compared to negative controls, i.e., FRDA4078 cells untreated or treated with an empty pCR3.1 plasmid (Figure S2C). The results showed that *FXN* mRNAs was not increased in the cells treated with npITALE<sub>VP64-8-15</sub> and npITALE<sub>VP64-F4-15</sub> compared to the negative controls. The *FXN* mRNA normalized with GAPDH and HPRT mRNAs did not change relative to the negative controls. Thus these 2 npITALE<sub>VP64s</sub> with nRVDs (i.e., CI, NN and NG) did not activate the *FXN* gene in FRDA4078 cells. The efficacy of these 2 npITALE<sub>VP64s</sub> was decreased compared to pITALE<sub>sVP64s</sub> targeting the same sequences.

### **Epigenetic change of the *FXN* gene with p300 acetyltransferase fused with pITALEs**

P300 is a histone acetyltransferase (HAT) that regulates the transcription and remodeling of chromatin by histone acetylation. We fused p300 with pITALEs targeting either the transcription initiation region or a sequence in intron 1 of the *FXN* gene. These pITALE<sub>p300</sub> have been reported to be more effective to induce gene transcription after histone H3-lysine acetylation<sup>2</sup>. We constructed 3 pITALE<sub>p300s</sub> (Figure S2D) targeting 3 sequences (i.e., 6, 8 and F4) of the *FXN* gene. FRDA4087 cells were nucleofected with each of these 3 pITALE<sub>p300s</sub>. The *FXN* gene transcription of these treated cells was compared 3 days later with the negative controls (untreated cells and cells treated with empty pCR3.1) (Figure S2E). When the *FXN* mRNA was normalized with either GAPDH or HPRT, the increases obtained with pITALE<sub>p300-6-15</sub> and with pITALE<sub>p300-8-15</sub> reached significant levels, but their effects were not as much as the effect of pITALE<sub>VP64</sub>.

The effects of pITALE<sub>p300s</sub> were very low compared to those of pITALE<sub>VP64s</sub> targeting the same sequences. Thus, to activate the endogenous *FXN* gene, VP64 effectors are more potent than p300 effectors fused with pITALEs targeting sequences either in the promoter or in intron 1 of the *FXN* gene.

### **Study of the synergistic effects of pTALE<sub>VP64s</sub> and pTALE<sub>p300</sub> on *FXN* gene transcription in FRDA4078 cells**

To study the synergistic effect of several pTALE<sub>VP64</sub> together, we treated FRDA4078 with the combinations of the 2, 3 or 4 most effective pTALE<sub>VP64s</sub>. The *FXN* mRNAs increased even more when we treated these cells with several pTALE<sub>VP64s</sub> compared to the negative controls. The synergistic effect increased the *FXN* transcription normalized with GAPDH up to 3 folds when 4 effectors targeting sequences 6, 8, 10 and F4 were used (Figure 2A and B).

Analysis of the expression of the frataxin protein in cells treated by the different combinations of pTALE<sub>VP64s</sub> and in the negative control showed an increase of slightly more than 2.5 folds with the combination of pTALE<sub>6-15</sub> and pTALE<sub>8-15</sub>. The combination of 3 pTALES only increased frataxin expression by 1.9 fold over the negative control (Figure 2D and E). Therefore, these 3 pTALES do not have a synergistic effect on the expression of frataxin compared with the effect of a single pTALE (Figure 2D and E).

The synergistic effects of the various combinations of pTALE<sub>VP64s</sub> with pTALE<sub>p300s</sub> and several pTALE<sub>p300s</sub> together, targeting the different sequences of the *FXN* gene, were investigated in FRDA4078 cells (Figure S3A and B). The transcriptional activity of the *FXN* gene was increased about 2 folds by two combinations: pTALE<sub>VP64-6-15</sub> with pTALE<sub>p300-8-15</sub> and pTALE<sub>VP64-8-15</sub> with pTALE<sub>p300-6-15</sub>. Our previous results had shown that pTALE<sub>VP64-6-15</sub> or pTALE<sub>VP64-8-15</sub> alone also increased the transcriptional activity of the *FXN* gene in the FRDA4078 cells by only 2 folds. Thus, the effect of the combination of these 2 pTALES (VP64 + p300) did not activate the *FXN* transcription more than a pTALE<sub>VP64</sub> alone. However, the combination of pTALE<sub>p300-6-15</sub> with pTALE<sub>p300-8-15</sub> significantly increased *FXN* transcription by 2 folds compared to the controls showing a small synergistic effect. This activity was equivalent to the effect of a single pTALE<sub>VP64</sub> with 15 RVD targeting sequences 6, 8 or F4.

### **Labelling the target locus of gene frataxin with pTALE<sub>ST10X</sub> expressed with the CAG or CMV promoter**

We subsequently constructed pAAV-pITALE<sub>ST10X-6-15</sub> and pAAV-pITALE<sub>ST10X-8-15</sub>. We also made the pAAV-scFv (pAAV-scFv-sfGFP-VP64-GB1-NLS). These pAAV plasmids contained a CAG promoter while our previous pCR3.1 plasmid contained a CMV promoter. The new constructions were initially tested *in vitro* in FRDA4078 cells using the same nucleofection protocol to compare their effectiveness relative to the previous pCR3.1 plasmids. The pITALE<sub>ST10X</sub> effectors expressed by pAAV and pCR3.1 similarly increased *FXN* transcriptional activity (Figure S4A and B). *FXN* transcription was increased by more than 8 folds by pITALE<sub>ST10X-6-15</sub> expressed either by pCR3.1 or by pAAV. This activity was also increased about 5 folds by pITALE<sub>ST10X-8-15</sub> expressed by pAAV and by about 8 folds by pITALE<sub>ST10X-8-15</sub> expressed by pCR3.1. These two effectors expressed either by pCR3.1 or pAAV synergistically increased the *FXN* transcription more than 18 folds.

Microscopic observation of the nuclei of the cells treated with this ST system revealed a much brighter sfGFP fluorescence in the nuclei of the cells nucleofected with a combination pITALE<sub>ST10X-6-15</sub> and pITALE<sub>ST10X-8-15</sub>, which recruited a total of 20 scFv-sfGFP-VP64s (i.e., 10 tags for each pITALE) compared with the negative controls treated with a plasmid, which did not express the pITALE<sub>ST10X</sub>, and a plasmid, which expressed only scFv-sfGFP-VP64 (Figure S4C). The sfGFP of the latter was expressed in the cytoplasm and in the nucleus but did not label the nuclei intensively in the absence of pITALE<sub>ST</sub>. With the SunTag system, the two pITALE<sub>ST10X</sub> (targeting sequences 6 and 8 separated by 10 nucleotides) recruited 20 scFv-sfGFP-VP64 leading to an intense fluorescent labeling of the nuclei confirming the *FXN* targeting by the 2 pITALE<sub>ST10X</sub>.

*In vitro* treatment of FRDA4078 cells with pAAV-pITALE<sub>ST10Xs</sub> or pCR3.1-pITALE<sub>ST10Xs</sub> activated the expression of the endogenous *FXN* gene. However, microscopic observations of the cells treated with these effectors showed a much brighter nuclear labeling of cells treated with

pCR3.1 plasmids than with pAAV plasmids (Figure S4D). The signal difference may be due to the different promoters.

## Bibliography

1. Miller, JC, Zhang, L, Xia, DF, Campo, JJ, Ankoudinova, IV, Guschin, DY, *et al.* (2015). Improved specificity of TALE-based genome editing using an expanded RVD repertoire. *Nature Methods* **12**: 465.
2. Hilton, IB, D'Ippolito, AM, Vockley, CM, Thakore, PI, Crawford, GE, Reddy, TE, *et al.* (2015). Epigenome editing by a CRISPR/Cas9-based acetyltransferase activates genes from promoters and enhancers. *Nature biotechnology* **33**: 510-517.

## Figures and legends

### Figure S1

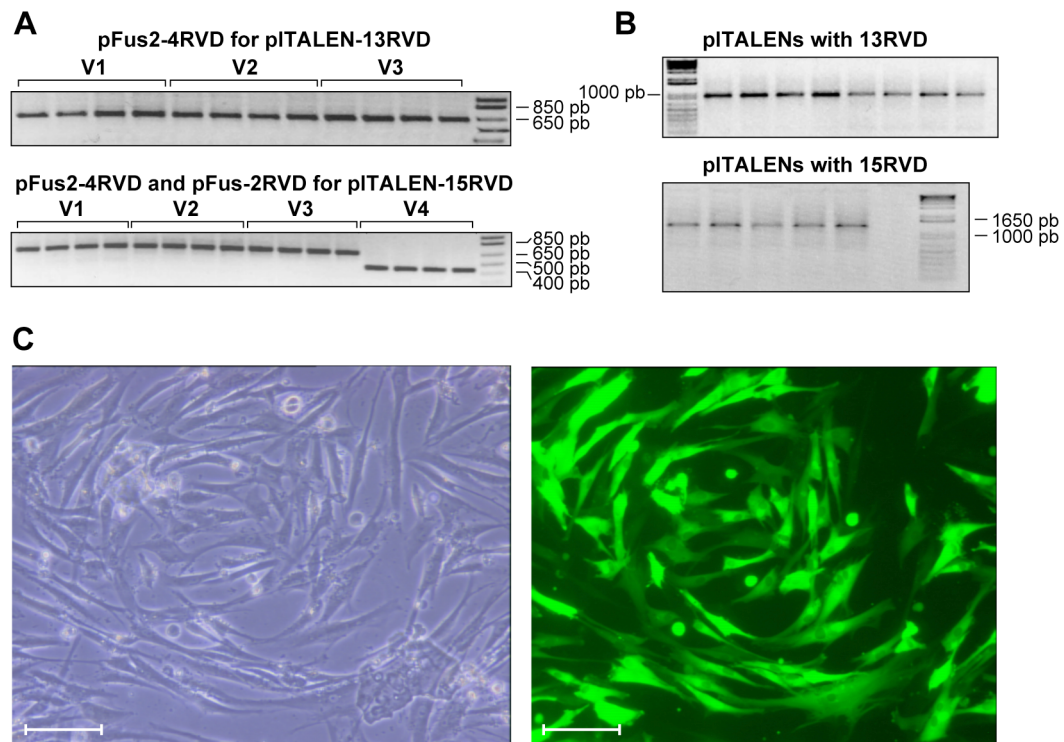

**Figure S1: Validation of the construction of pTALE<sub>VP64s</sub> targeting different sequences of the *FXN* gene and nucleofected in FRDA4078 fibroblasts.**

**A)** The figure illustrates the PCR amplification of sequences containing 4 RVDs (V1, V2 and V3) corresponding to the first 12 RVDs of pTALLEN-13RVD or pTALLEN-15RVD. The V4 is the PCR amplification of the assembly of 2 RVDs corresponding to the thirteenth and fourteenth RVDs of pTALLEN-15RVD. **B)** PCR to select the adequate final assembly of pTALLENs with 13 RVDs (1332 pb) and 15 RVDs (1532 pb). **C)** Representative image of FRDA4078 fibroblasts (left side in phase contrast and right side in fluorescence), 24 h after nucleofection with a plasmid containing the GFP gene. Scale bars in C are 100  $\mu\text{m}$ .

**Figure S2**

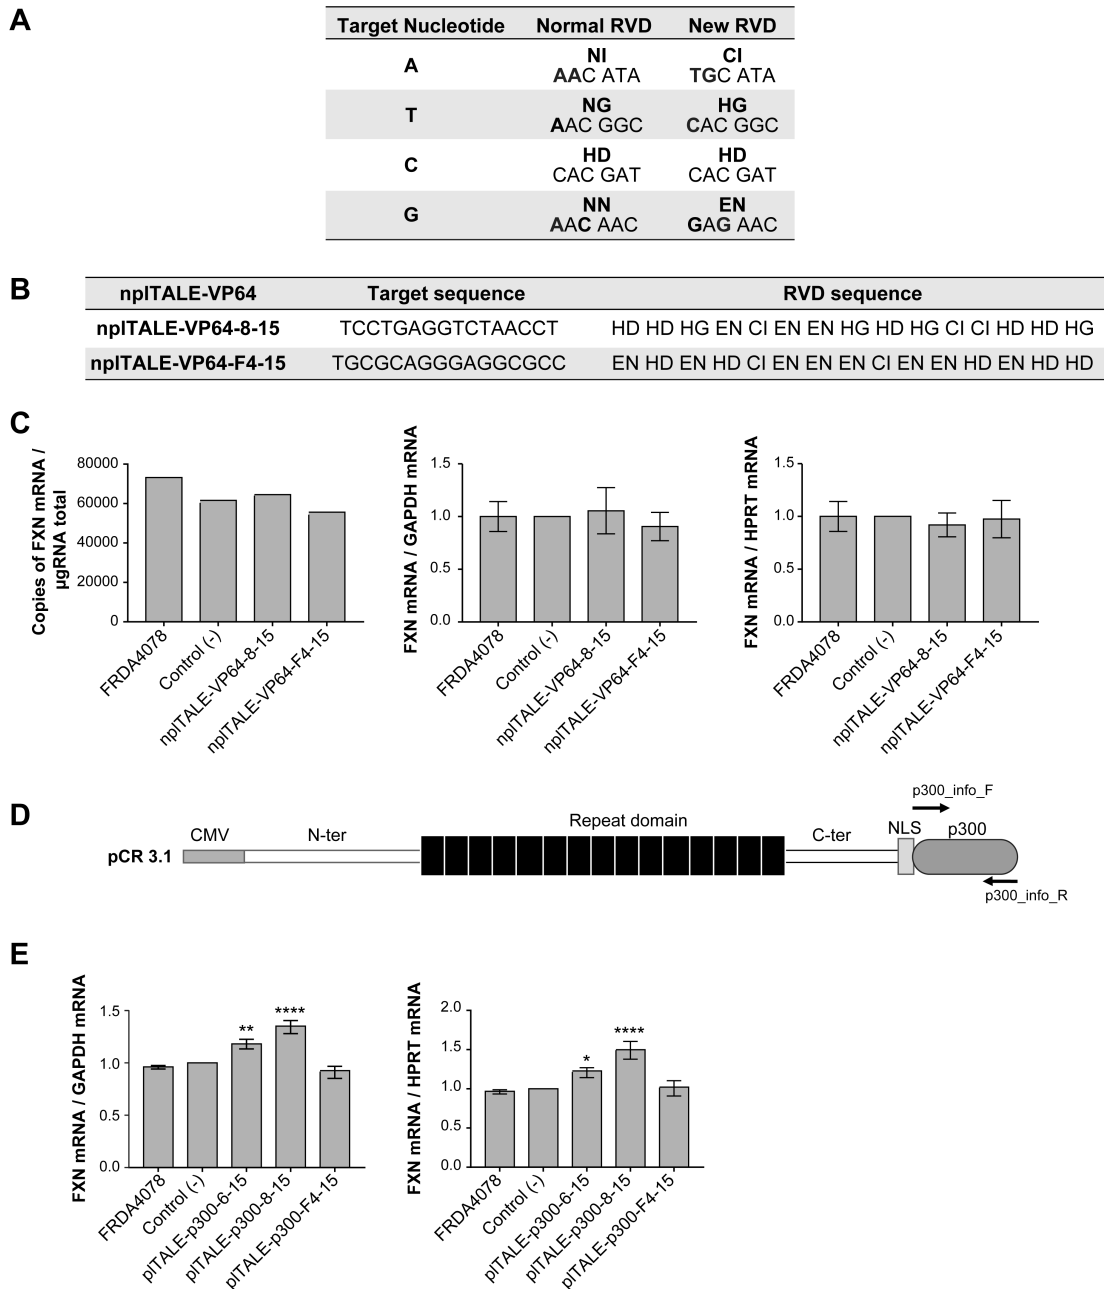

**Figure S2: Study of the effects of the npITALE<sub>VP64s</sub> and pITALE<sub>p300s</sub>.**

**A)** The amino acid pairs and the codons of the normal and new RVDs targeting a specific nucleotide. **B)** List of npITALE<sub>VP64s</sub> with their new RVD sequences and their target sequences. **C)** *FXN* gene mRNA in control cells and in FRDA4078 cells treated with npITALE<sub>VP64</sub>. **D)** Scheme



of pITALE<sub>p300</sub> in pCR3.1 containing the CMV promoter, N-ter, repeat domain, C-ter, NLS and p300. E) *FXN* gene transcriptional activity in control cells and in cells treated with a pITALE<sub>p300</sub>. This activity was demonstrated by comparing in control cells and in the treated cells the number of copies of *FXN* mRNA, the number *FXN* mRNAs normalized with GAPDH mRNAs or with the HPRT mRNA. Statistics:  $p < 0.05^*$ ,  $p < 0.003^{**}$  and  $p < 0.0001^{****}$ .

**Figure S3**

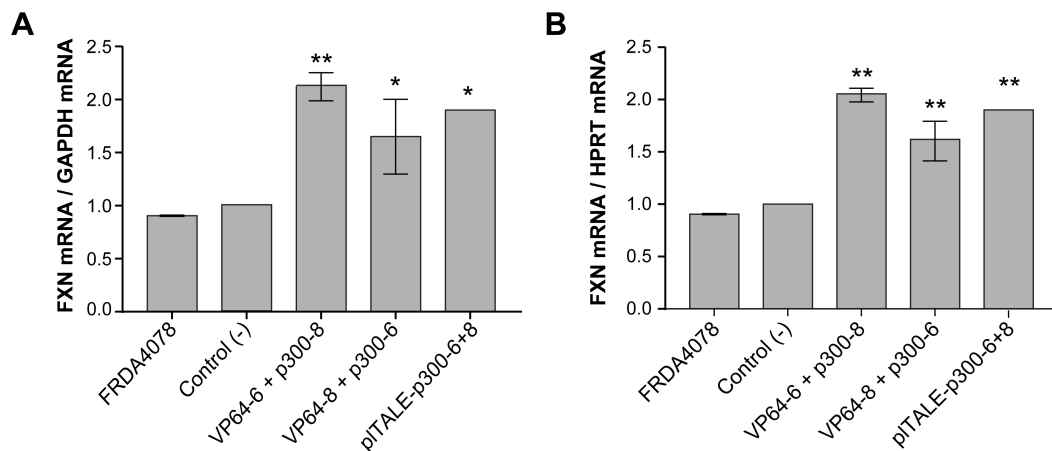

**Figure S3 Absence of synergistic effects of pITALE<sub>VP64</sub> and pITALE<sub>p300</sub> in FRDA4078 fibroblasts.**

**A)** and **B)** *FXN* gene transcriptional activity with the combined effects of pITALE<sub>VP64</sub> + pITALE<sub>p300</sub> or combined effects of 2 pITALE<sub>p300s</sub>, which targeted sequences 6 and 8. The effectors used for this test were pITALE<sub>VP64-6-15</sub>, pITALE<sub>VP64-8-15</sub>, pITALE<sub>p300-6-15</sub> and pITALE<sub>p300-8-15</sub>. Statistics:  $p < 0.05^*$  and  $p < 0.003^{**}$ .

**Figure S4**

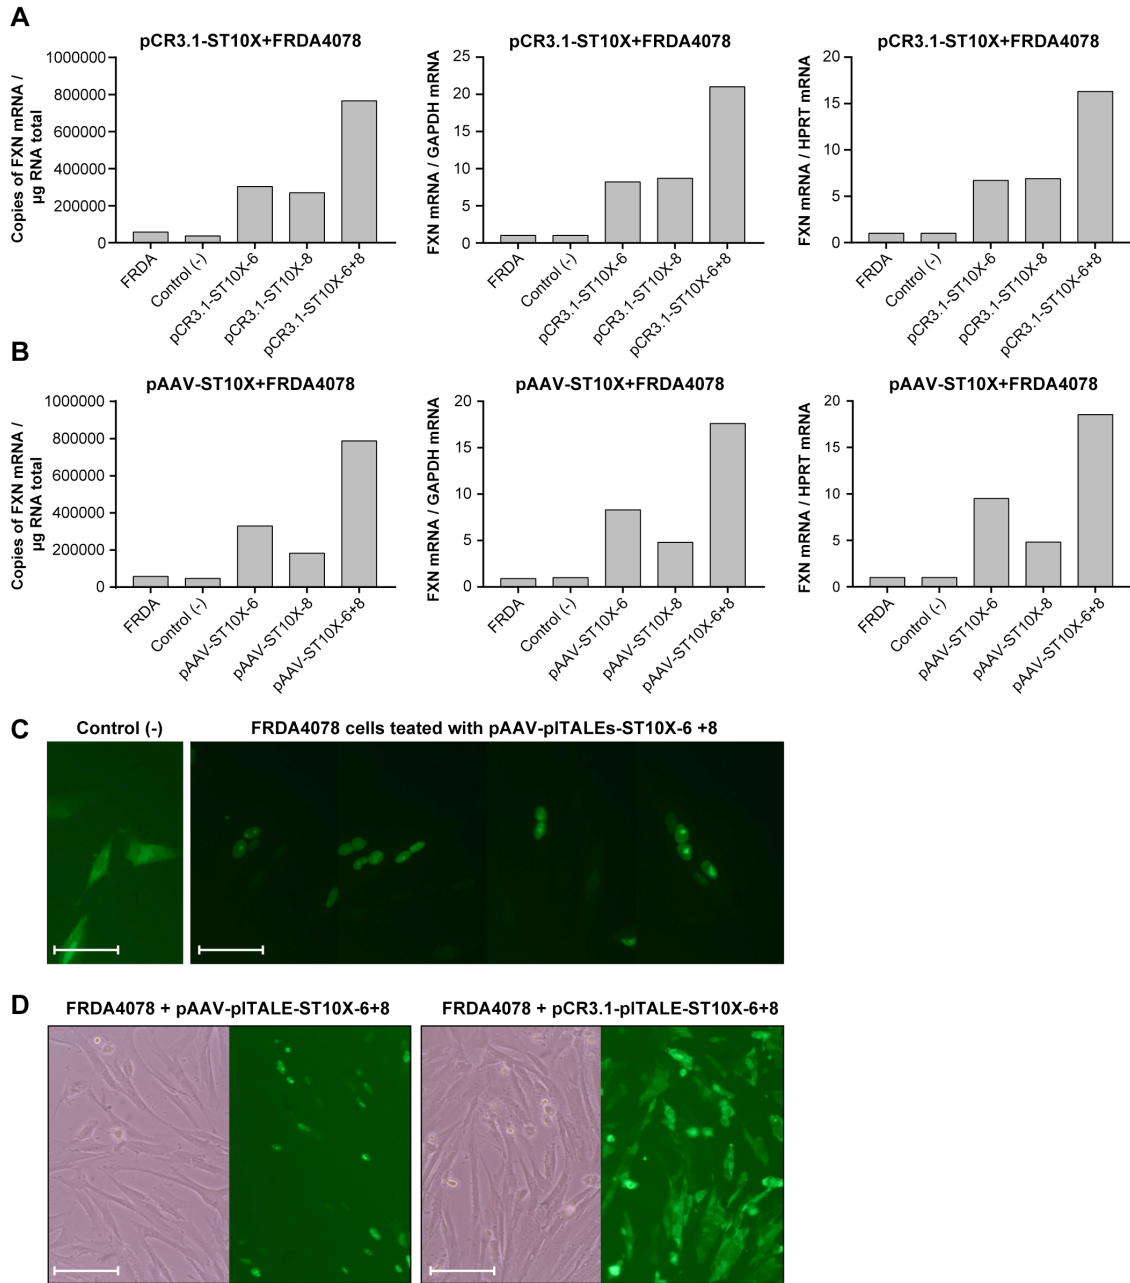

**Figure S4: Induction of *FXN* gene in FRDA4078 cells with pTALEs<sub>STs</sub> expressed by CMV or CAG promoter, and their nucleus location.**

**A) and B)** *FXN* gene mRNA normalized with GAPDH or HPRT mRNA in untreated FRDA4078 (control -) or treated with 1 or 2 pTALEs<sub>ST10Xs</sub> and scFV-sfGFP-VP64-GB1-NLS (scFv)

expressed by the pCR3.1 plasmid (promoter CMV) or the pAAV plasmid (promoter CAG). **C)** Left side: GFP fluorescence in a negative control, i.e., FRDA4078 cells treated with the pAAV-scFV-GFP plasmid, which did not express by the pITALE and with pAAV-scFv. In these cells, the GFP green fluorescence is uniform over the whole cells there no intense labelling of the nuclei. Right side: FRDA4078 cells treated with pAAV-pITALE<sub>ST10X-6</sub> + pAAV-pITALE<sub>ST10X-8</sub> + pAAV-scFv. These cells contain brighter nuclei due to pITALE<sub>ST10Xs</sub> targeting the specific nucleotide sequences 6 and 8 and each ST recruiting 10 scFv-sfGFP-VP64-GB1 complexes (for a total of 20 complexes). **D)** Phase contrast and GFP fluorescence of FRDA4078 cells treated with different pITALE<sub>ST10X</sub>. Left side: FRDA4078 cells treated with pAAV-pITALE<sub>ST10X-6-15</sub> + pAAV-pITALE<sub>ST10X-8-15</sub> + pAAV-scFv, the GFP signal is localized at the pITALE targeted loci that fix 10 GFP-FV64 for each pITALE (a total of 20 GFP-VP64) leading to intense fluorescence of the nuclei. Right side: FRDA4078 cells treated with pCR3.1-pITALE<sub>ST10X-6-15</sub> + pCR3.1-pITALE<sub>ST10X-8-15</sub> + pCR3.1-scFV led to recruitment of GFP and to intense labelling of the nuclei. Scale bars in C are 50  $\mu\text{m}$  and in D 100  $\mu\text{m}$ .

**Figure S5**

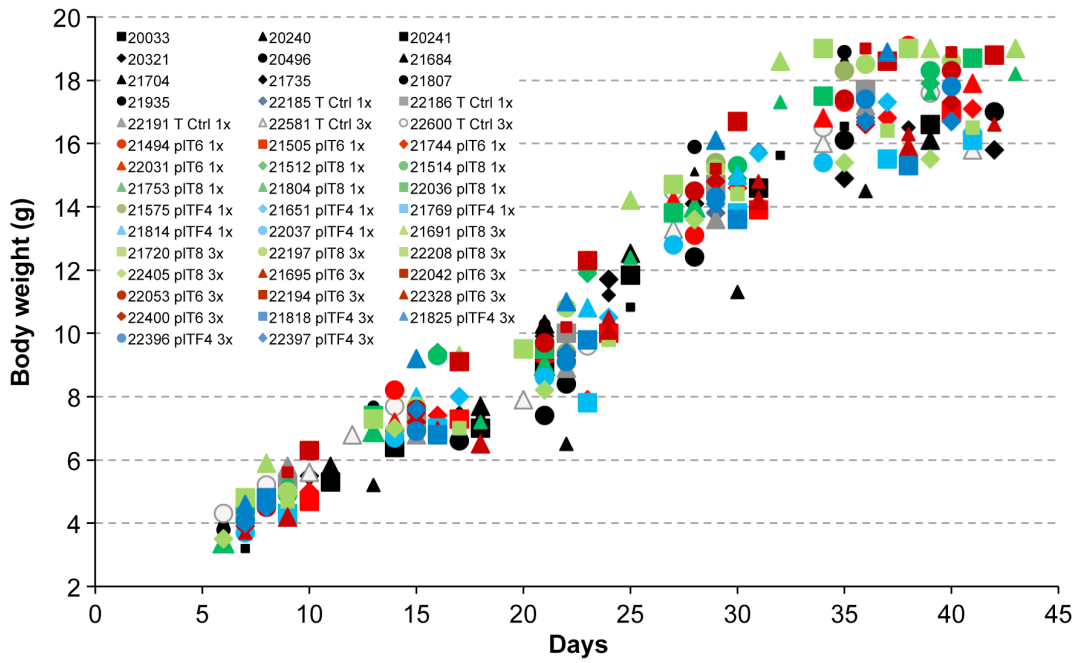

**Figure S5: Body weight of untreated mice and mice treated with the different viruses.**

Representative diagram of the weights of different YG8R mice treated with AAV9 that express pITALE<sub>VP64-6-15</sub>, pITALE<sub>VP64-8-15</sub> or pITALE<sub>VP64-F4</sub> compared to control YG8R mice either untreated or treated with AAV9 (AAV9-ctrl), which did not express pITALE<sub>VP64</sub>.

**Figure S6**

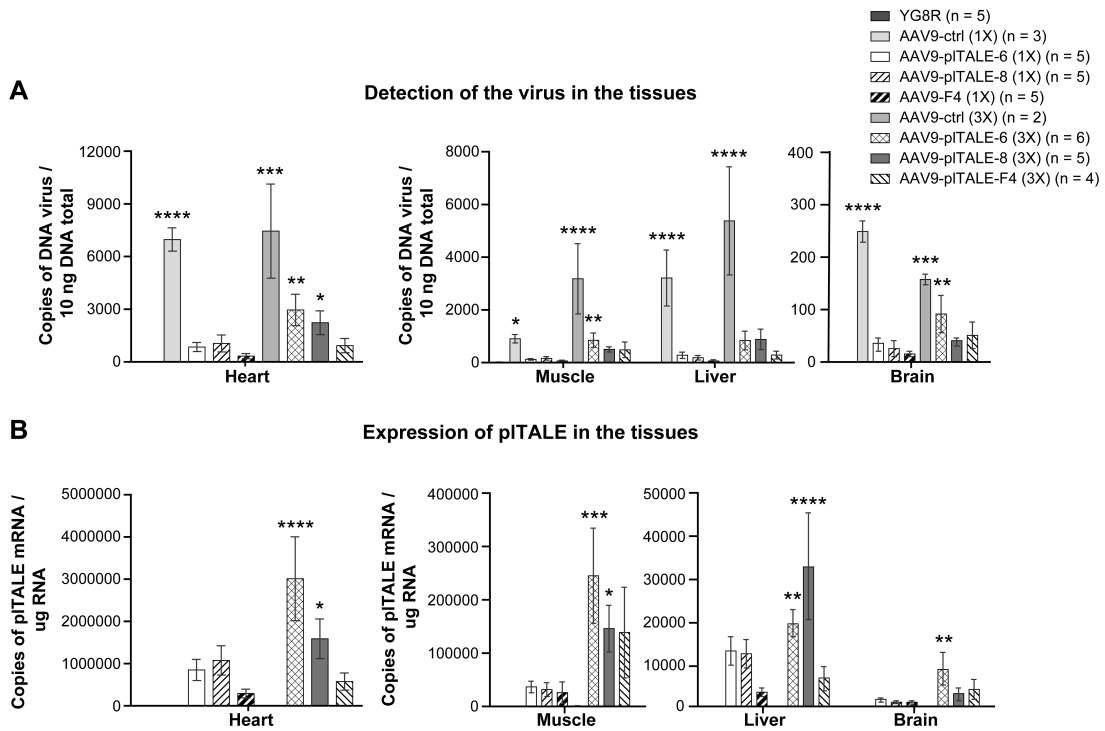

**Figure S6: The distribution and expression of AAV-pITALE<sub>VP64</sub> *in vivo* in YG8R mice**

**A)** Quantification of AAV9 genome in tissues: muscle, heart, liver and brain compared to untreated mice (YG8R). **B)** The expression level of pITALE<sub>VP64</sub> in tissues: muscle, heart, liver and brain compared to untreated mice (YG8R). Statistics:  $p < 0.05^*$ ,  $p < 0.003^{**}$ ,  $p < 0.0003^{***}$  and  $p < 0.0001^{****}$ .

**Figure S7**

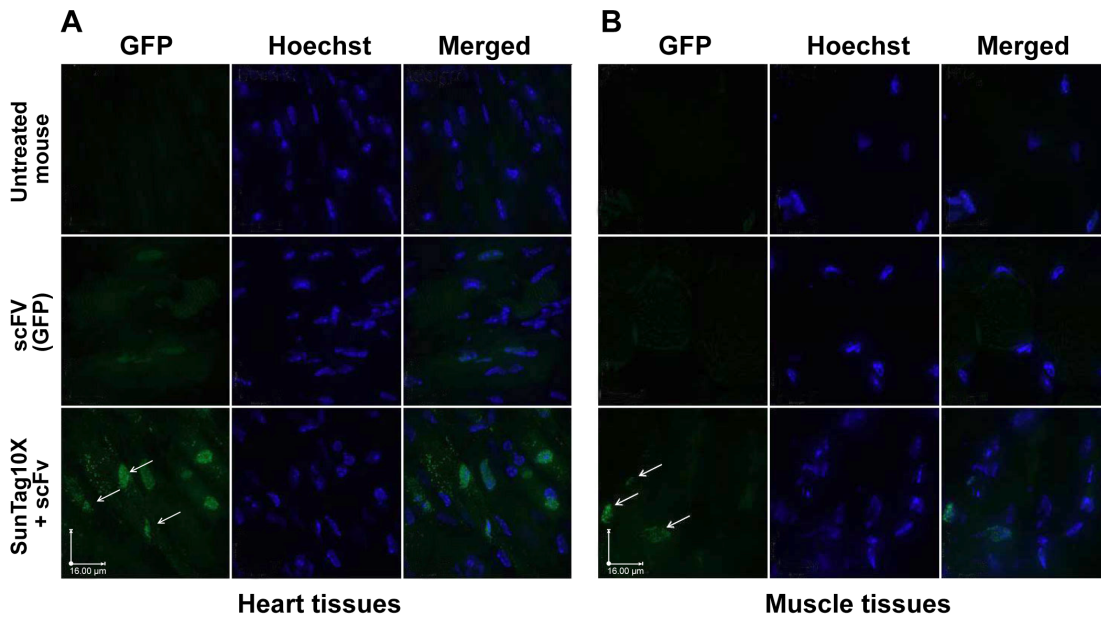

**Figure S7: Labeling of the nuclei in mice treated with pITALE<sub>ST10X</sub>.**

A) and B) YG8R mice were injected IP with 3 different AAV viruses (i.e.,  $3 \times 10^{11}$  v.p. AAV9-pITALE<sub>ST10X-6</sub> +  $3 \times 10^{11}$  v.p. AAV9-pITALE<sub>ST10X-8</sub> +  $3 \times 10^{11}$  v.p. AAV9-scFV-sfGFP-VP64). The confocal microscopy images illustrate the localization of the 20 scFV-sfGFP-VP64s recruited by pITALE<sub>ST10X-6</sub> and pITALE<sub>ST10X-8</sub> targeting the *FXN* gene promoter. The GFP fluorescence is concentrated at the nuclei (arrows) only in the heart (A) and the muscles (B) treated with AAV9s that expressed both pITALE<sub>ST10X</sub> and scFV-sfGFP-VP64 compared to control mouse cells where scFV-sfGFP-VP64 is expressed throughout the cytoplasm and the nucleus of the cells in the absence of pITALE<sub>ST10XS</sub>. (Scale bar: 16 μm).

**Figure S8**

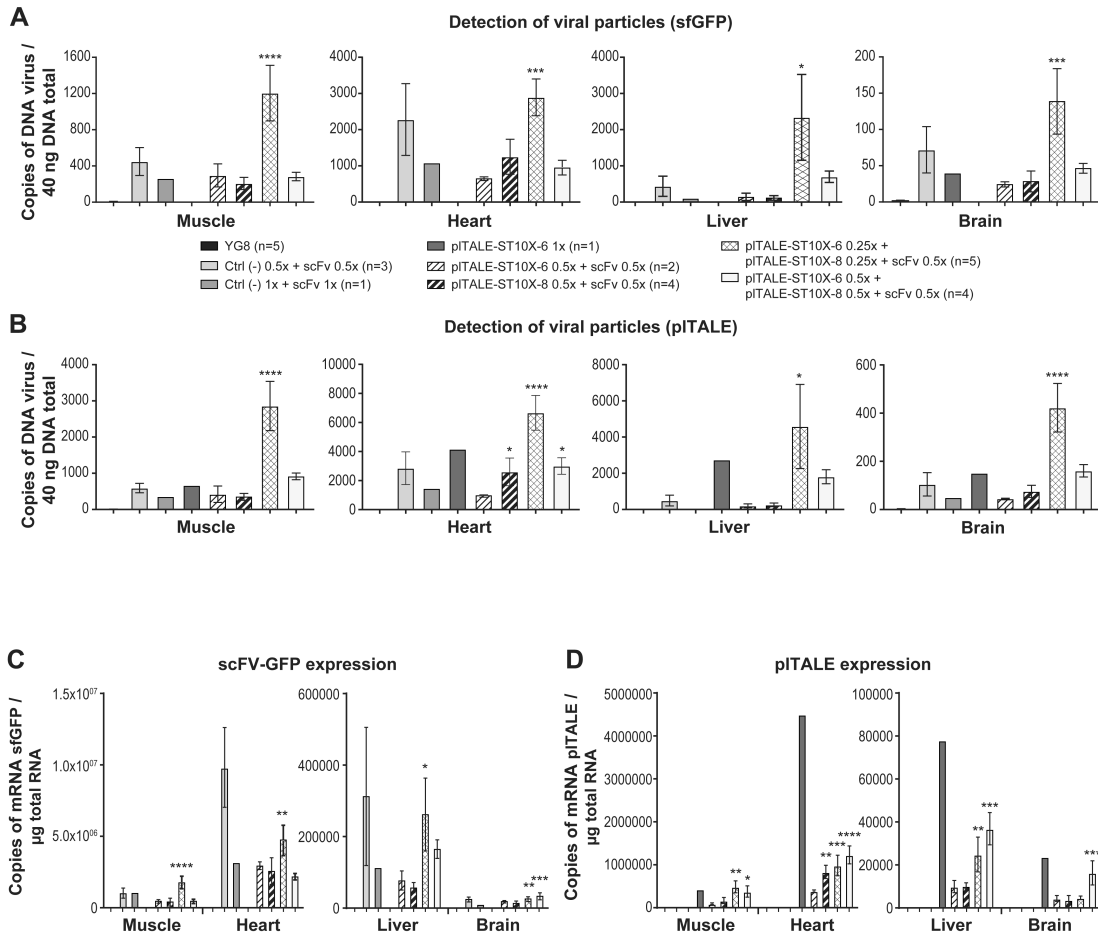

**Figure S8: The distribution and expression of AAV-pITALE<sub>ST10X</sub> *in vivo* in YG8R mice**

**A)** and **B)** Number of copies of AAV9 viruses, expressing either scFV or a pITALE<sub>ST10X</sub>, in various organs of control and treated mice. **C)** and **D)** The number copies of pITALE<sub>ST10X</sub> mRNA and scFV-GFP mRNA in various organs of mice that received different treatments and untreated mice. Statistics:  $p < 0.05^*$ ,  $p < 0.003^{**}$ ,  $p < 0.0003^{***}$  and  $p < 0.0001^{****}$ .

## Supplementary Table 1

| Gene Symbol  | Description                                                                                                            | GenBank          | Size (pb)  | Primer sequence 5' 3' SIAS                           |
|--------------|------------------------------------------------------------------------------------------------------------------------|------------------|------------|------------------------------------------------------|
| <b>FXN</b>   | <b>Homo sapiens frataxin (FXN) , nuclear gene encoding mitochondrial prote in, common region for the 3 transcrpits</b> | <b>NM 000144</b> | <b>106</b> | AAGCCATACACGTTTGAGGACTA/TTGGCGTCTGCTTGTTGATCA        |
| <b>TALES</b> |                                                                                                                        |                  | <b>136</b> | GAGTCGGTGTTCACAGAACTCGAG/CGCCTGGTCAGGTGTCTGAGTTG     |
| <b>GFP</b>   |                                                                                                                        |                  | <b>157</b> | CCTCGTGACCACCCTGACCTAC/CTCGGCGGGTCTTGTAGTT           |
| <b>sfGFP</b> |                                                                                                                        |                  | <b>153</b> | ACGCGTGCTGAAGTCAAGTTTG/CTTTGTTTTGTCTGCCGTGATGTATAC   |
| <b>HPRT1</b> | <b>Mus musculus hypoxanthine guanine phosphoribosyl transferase I (Hprt1)</b>                                          | <b>NM 013556</b> | <b>106</b> | CAGGACTGAAAGACTTGCTCGAGAT/CAGCAGGTCAGCAAAGAACTTATAGC |
| <b>GAPDH</b> | <b>Mus musculus glyceraldehyde -3-phosphate dehydrogenase</b>                                                          | <b>NM_008084</b> | <b>194</b> | GGCTGCCCAGAACATCATCCCT/ATGCCTGCTTCACCACCTTCTTG       |
| <b>ADNg</b>  |                                                                                                                        | <b>NT_039239</b> | <b>209</b> | CACCCCTTAAGAGACCCATGTT/CCCTGCAGAGACCTTAGAAAAC        |
